# Supplementary material for: Hydralazine and Panobinostat Attenuate Malignant Properties of Prostate Cancer Cell Lines
Source: MDPI journal article supplement (doi:10.3390/ph14070670), 2021-07-13
Supplement: s1 [file s1]

Supplementary Data

Table S1. Number of cells seeded in 6-well culture plates for the Colony Formation Assay.

| No. of seeded cells |      |
|---------------------|------|
| DU145               | 750  |
| PC-3                | 750  |
| LNCaP               | 1500 |
| 22Rv1               | 1125 |
| RWPE-1              | 1500 |
| WPMY-1              | 750  |

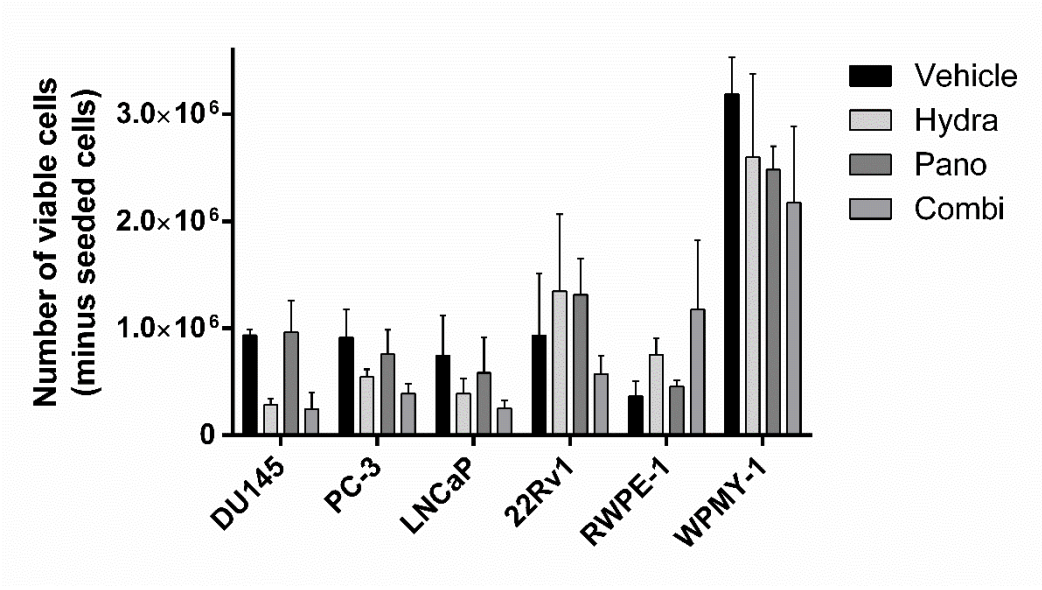

Figure S1. Number of viable cells at day 3 of treatment with Hydralazine, Panobinostat and the combination treatment. Cells were treated with the selected combinations, harvested after treatment and counted. The seeded cells ( $1 \times 10^5$ ) were subtracted to the number of viable cells of every cell line. Experiments were carried out in three biological replicates ( $n=3$ ).
